# Supplementary material for: 3,4-dihydroxyphenylethyl alcohol glycoside reduces acetaminophen-induced acute liver failure in mice by inhibiting hepatocyte ferroptosis and pyroptosis
Source: PeerJ. 2022 Mar 14;10:e13082. doi: 10.7717/peerj.13082 (PMC8929172; doi:10.7717/peerj.13082)
Supplement: Supplemental Information 2 [file peerj-10-13082-s002.xlsx]

## Sheet: Sheet1
Cont	APAP	APAP+3,4-DAG
58.9162	93.9821	65.4242
58.8969	93.1923	72.3282
72.0551	95.2603	70.3015
58.2418	92.8525	70.1239
