# Supplementary material for: 3,4-dihydroxyphenylethyl alcohol glycoside reduces acetaminophen-induced acute liver failure in mice by inhibiting hepatocyte ferroptosis and pyroptosis
Source: PeerJ. 2022 Mar 14;10:e13082. doi: 10.7717/peerj.13082 (PMC8929172; doi:10.7717/peerj.13082)
Supplement: Supplemental Information 3 [file peerj-10-13082-s003.xlsx]

## Sheet: Sheet1
Cont	APAP	APAP+3,4-DAG
34.43	202.67	123.62
42.09	234.53	98.45
55.37	243.09	60.25
47.3	198.45	79.35
