# Supplementary material for: 3,4-dihydroxyphenylethyl alcohol glycoside reduces acetaminophen-induced acute liver failure in mice by inhibiting hepatocyte ferroptosis and pyroptosis
Source: PeerJ. 2022 Mar 14;10:e13082. doi: 10.7717/peerj.13082 (PMC8929172; doi:10.7717/peerj.13082)
Supplement: Supplemental Information 4 [file peerj-10-13082-s004.xlsx]

## Sheet: Sheet1
Cont	APAP	APAP+3,4-DAG
43.62	132.87	93.77
54.21	143.91	98.34
67.33	142.37	46.29
52.87	135.51	79.95
