# Supplementary material for: 3,4-dihydroxyphenylethyl alcohol glycoside reduces acetaminophen-induced acute liver failure in mice by inhibiting hepatocyte ferroptosis and pyroptosis
Source: PeerJ. 2022 Mar 14;10:e13082. doi: 10.7717/peerj.13082 (PMC8929172; doi:10.7717/peerj.13082)
Supplement: Supplemental Information 22 [file peerj-10-13082-s022.xlsx]

## Sheet: Sheet1
Cont	APAP	APAP+3,4-DAG
414.359	215.589	253.814
389.13	175.835	268.339
363.902	169.719	254.578
396.776	189.596	220.94
