# Supplementary material for: 3,4-dihydroxyphenylethyl alcohol glycoside reduces acetaminophen-induced acute liver failure in mice by inhibiting hepatocyte ferroptosis and pyroptosis
Source: PeerJ. 2022 Mar 14;10:e13082. doi: 10.7717/peerj.13082 (PMC8929172; doi:10.7717/peerj.13082)
Supplement: Supplemental Information 23 [file peerj-10-13082-s023.xlsx]

## Sheet: Sheet1
Cont	APAP	APAP+3,4-DAG
6.69435	2.37532	4.31586
7.97532	2.94369	4.26863
8.02564	1.83565	3.99756
7.14744	1.94673	4.15785
