# Supplementary material for: 3,4-dihydroxyphenylethyl alcohol glycoside reduces acetaminophen-induced acute liver failure in mice by inhibiting hepatocyte ferroptosis and pyroptosis
Source: PeerJ. 2022 Mar 14;10:e13082. doi: 10.7717/peerj.13082 (PMC8929172; doi:10.7717/peerj.13082)
Supplement: Supplemental Information 24 [file peerj-10-13082-s024.xlsx]

## Sheet: Results
Cont	APAP	APAP+3,4-DAG
5.39891	2.66667	4.91803
5.11475	2.94369	4.43716
6.51366	2.9071	5.81421
6.14208	2.57923	5.04918
6.35926	2.3388	4.98361
