# Supplementary material for: 3,4-dihydroxyphenylethyl alcohol glycoside reduces acetaminophen-induced acute liver failure in mice by inhibiting hepatocyte ferroptosis and pyroptosis
Source: PeerJ. 2022 Mar 14;10:e13082. doi: 10.7717/peerj.13082 (PMC8929172; doi:10.7717/peerj.13082)
Supplement: Supplemental Information 25 [file peerj-10-13082-s025.xlsx]

## Sheet: Results
Cont	150μΜ DAG	APAP	APAP + 50μΜ DAG	APAP + 100μΜ DAG	APAP + 150μΜ DAG
12.8589	14.0859	4.76074	4.66258	8.39264	11.092
11.5556	12.1481	4.64198	4.34568	7.80247	11.1605
14.1463	16	4.87805	4.97561	8.97561	11.0244
