# Supplementary material for: 3,4-dihydroxyphenylethyl alcohol glycoside reduces acetaminophen-induced acute liver failure in mice by inhibiting hepatocyte ferroptosis and pyroptosis
Source: PeerJ. 2022 Mar 14;10:e13082. doi: 10.7717/peerj.13082 (PMC8929172; doi:10.7717/peerj.13082)
Supplement: Supplemental Information 26 [file peerj-10-13082-s026.xlsx]

## Sheet: Results
Cont	150μΜ DAG	APAP	APAP + 50μΜ DAG	APAP + 100μΜ DAG	APAP + 150μΜ DAG
1	1.76	8.86	9.35	3.94	3.65
1	1.48	14.18	9.26	4.21	5.4
1	1.67	10.91	11.81	6.5	3.9
