# Supplementary material for: 3,4-dihydroxyphenylethyl alcohol glycoside reduces acetaminophen-induced acute liver failure in mice by inhibiting hepatocyte ferroptosis and pyroptosis
Source: PeerJ. 2022 Mar 14;10:e13082. doi: 10.7717/peerj.13082 (PMC8929172; doi:10.7717/peerj.13082)
Supplement: Supplemental Information 27 [file peerj-10-13082-s027.xlsx]

## Sheet: Results
Cont	150μΜ DAG	APAP	APAP + 50μΜ DAG	APAP + 100μΜ DAG	APAP + 150μΜ DAG
1	1.19	13.67	9.81	5.1	3.29
1	1.04	12.66	6.08	6.18	3.79
1	1.34	15.61	10.32	7.38	4.01
