# Supplementary material for: 3,4-dihydroxyphenylethyl alcohol glycoside reduces acetaminophen-induced acute liver failure in mice by inhibiting hepatocyte ferroptosis and pyroptosis
Source: PeerJ. 2022 Mar 14;10:e13082. doi: 10.7717/peerj.13082 (PMC8929172; doi:10.7717/peerj.13082)
Supplement: Supplemental Information 28 [file peerj-10-13082-s028.xlsx]

## Sheet: Results
Cont	150μΜ DAG	APAP	APAP + 50μΜ DAG	APAP + 100μΜ DAG	APAP + 150μΜ DAG
1	0.88	13.32	14.87	2.7	2.66
1	1.52	10.92	8.6	2.5	2.6
1	2.34	7.93	11.43	4.23	3.91
